# Supplementary material for: Tuning the saturated red emission: synthesis, electrochemistry and photophysics of 2-arylquinoline based iridium(iii) complexes and their application in OLEDs
Source: Royal Society of Chemistry journal article supplement (doi:10.1039/b605783g), 2006-01-01
Supplement: b605783g.pdf [file b605783g.pdf]

## Electronic supplementary information (ESI)

---

# Tuning the saturated red emission: synthesis, electrochemistry and photophysics of 2-arylquinoline based iridium (III) complexes and their application in OLEDs

---

Lianqing Chen<sup>a</sup>, Han You<sup>b</sup>, Chuluo Yang<sup>a\*</sup>, Xiaowei Zhang<sup>a</sup>, Jingui Qin<sup>a\*</sup>, Dongge Ma<sup>b\*</sup>

<sup>a</sup> Department of Chemistry, Hubei Key Lab on Organic and Polymeric Optoelectronic Materials, Wuhan University, Wuhan 430072, China. Fax: 86-27-68756757; Tel: 86-27-68756757; E-mail: [clyang@whu.edu.cn](mailto:clyang@whu.edu.cn).

<sup>b</sup> State Key Laboratory of Polymer Chemistry and Physics, Changchun Institute of Applied Chemistry, Chinese Academy of Sciences, Changchun 130022, China E-mail: [mdg1017@ciac.jl.cn](mailto:mdg1017@ciac.jl.cn).

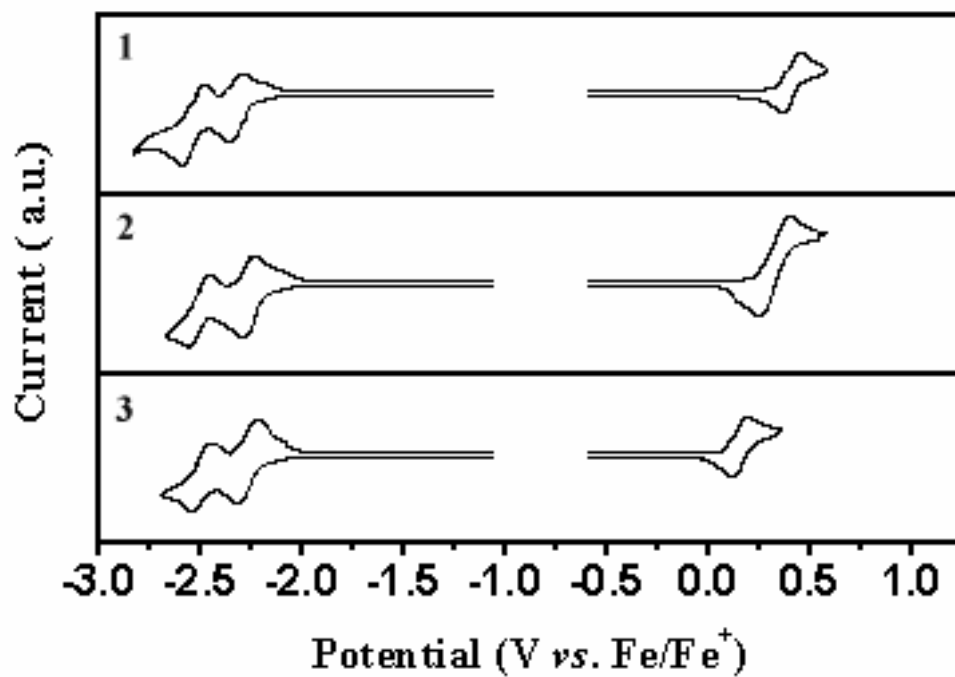

**Figure S1:** Representative cyclic voltammograms of complex 1, 2 and 3.

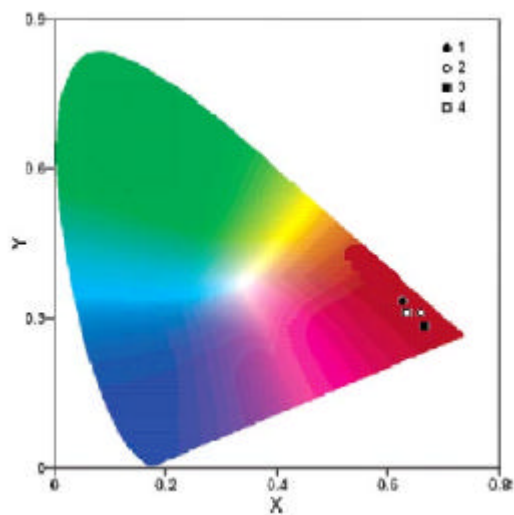

**Figure S2:** CIE 1931 coordinates plot for the devices using complex **1**, **2**, **3** and **4** as dopant at 3 % doping level.
